# Supplementary material for: Genomic testing to determine drug response: measuring preferences of the public and patients using Discrete Choice Experiment (DCE)
Source: PubMed Central journal article supplement (PMC3827922; doi:10.1186/1472-6963-13-454), 2013-10-31
Supplement: 1472-6963-13-454-S1.pdf [file 1472-6963-13-454-S1.pdf]

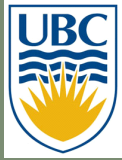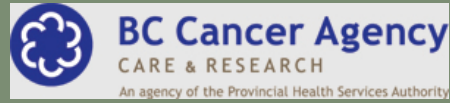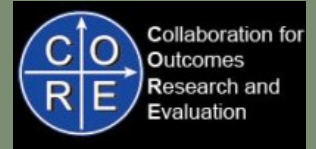

Start

## Study of Preferences for Delivery of A Genetic Test for Treatment of a Fast-acting Curable Cancer

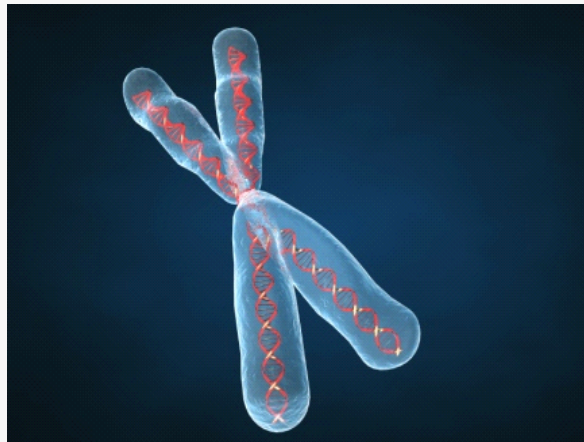

Next

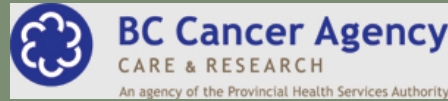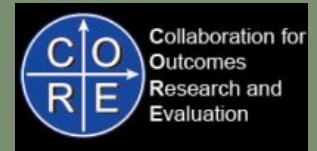

11

## Introduction

Thank you for participating in this survey that we are conducting at the [BC Cancer Research Center](#) to measure people's preferences regarding the use of genetic tests in cancer treatment. This study is being sponsored by [Genome BC](#).

12

## About the survey

This survey will take approximately **20 minutes** to complete. Your participation is optional, and you may choose to not answer any survey questions and/or withdraw your participation at any time. Your rights to privacy are protected by both federal and provincial laws which ensure that any responses you provide will be kept **confidential**.

The survey will describe a hypothetical disease scenario. Then you will be asked a series of questions regarding your preferences for a genetic test. This genetic test can help you to decide among your treatment options. Please read the following introduction about the survey questions. You can go back to **review or change your answers** by clicking back button of your internet browser at any point in the survey.

Next

0%  100%

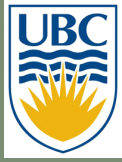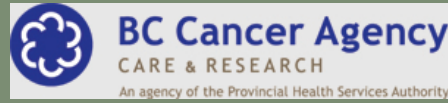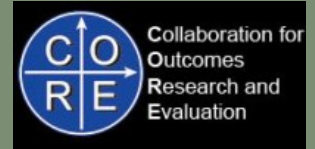

13

### Curable cancer

I imagine that you have recently been diagnosed with a **fast-acting but curable** form of cancer. Currently, approximately **50 out of 100 (50%)** of patients are cured after the first round of chemotherapy. If you are cured by this initial treatment, you will have a normal life expectancy, otherwise your life expectancy is approximately 1 year. In this case you will be given the second round of chemotherapy but your chance of being cured is about **10 out of 100 (10%)**.

14

### The new medication for curable cancer

By adding a **new medication** to the first round of chemotherapy the **cure rate increases** from **50 out of 100 (50%)** to **75 out of 100 (75%)**. However, only some of individuals can benefit from the new medication (**responders**) and other individuals receive absolutely no benefit from adding the new medication to the standard chemotherapy (**non-responders**).

The downside of adding the new medication to the standard chemotherapy is that it increases the likelihood and severity of treatment side-effects.

Next

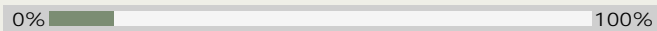



15

### The genetic test associated with the new medication

A new **genetic test** has just been developed for predicting whether you are a responder or a non-responder to the new medication. If you choose to not take the genetic test, you will receive the new medication in addition to standard chemotherapy without knowing if you are a responder or a non-responder.

16

### The benefits of the genetic test

The advantage of taking the genetic test is that if you learn that you are a non-responder you would receive the standard chemotherapy without adding the new medication and therefore you could avoid the associated side effects of the new medication.

17

### The downsides of the genetic test

The problem of the genetic test is that sometimes it gives **incorrect results**:

Some responders will be diagnosed as non-responders. These patients who could be cured by taking the new medication, will not receive it based on the wrong genetic test results.

Also some non-responders will be diagnosed as responders and the new medication will be added to their regular chemotherapy. They will receive absolutely no additional benefit from the new medication. However, they may experience side-effects of the new medication.

Next

0%  100%

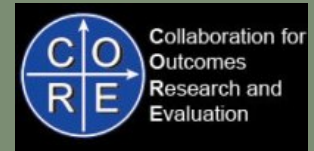

A1

Before you start the survey:

There are several characteristics (“Attributes”) of the genetic test and the new medication that may influence your decision for choosing among your treatment options. Below, you can find descriptions of these attributes.

A2

#### 1. Untreated Responders

Proportion of patients who could be cured by the new medication (responders) but will not receive it as a result of wrong genetic test result. This proportion shows how much error is involved in the genetic test results and it is better to be as low as possible.

A4

#### 2. Unnecessary Treatment of Non-responders

Proportion of patients who would not benefit from the new medication (non-responders) but will receive it as a result of wrong genetic test result. These patients will experience the additional side effects of the new medication without getting any benefit from that. This proportion shows how much error is involved in genetic test results and it is better to be as low as possible

A3

#### 3. Severity of Side Effects

The new medication may be associated with side effects such as nausea, hair loss, skin rash and fatigue. In the questionnaire below, the potential levels of Side Effect Severity are:

- *Severe*: Presence of one or more of the examples listed above. Assume that the treatment and/or test side effects would significantly impact your quality of life and that this impact would be comparable to or worse than living with the disease.
- *Moderate*: Some side effects associated with both the genetic test and the treatment. If there are any side effects, they are less severe than living with the disease.
- *Minimal*: No side effects or minimal side effects associated with both the genetic test and the treatment. If there are any side effects, they are much less severe than living with the disease.

A6

#### 4. Likelihood of Side Effects

The side effects described in Attribute 3 will not necessarily occur for all individuals. Instead, they will occur with a particular percentage chance. For example, if the likelihood of experiencing side effects is 25%, then 25 out of 100 people would be expected to experience side effects, while the remaining 75 people would experience no side effects.

A5

#### 5. Genetic Test Cost

Under the British Columbia Medical Services Plan, you would not be expected to pay for the genetic test and treatment medications. However, we are interested in knowing how highly you value these genetic test results. For the purposes of this exercise, please assume that you would be paying only for the genetic test out-of-pocket.

A7

#### 6. Genetic Test Turnaround Time

The time required to obtain the genetic test results, after the test has been performed.

A8

#### 7. Genetic Test Procedure

Type of the procedure that is needed for doing the genetic test. The genetic test can be a simple procedure such as mouth swab or blood sample or it can involve an invasive procedure such as collecting a liver or bone marrow sample using a needle following a local anesthesia.

Next

0%  100%

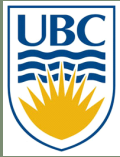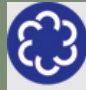

**BC Cancer Agency**  
CARE & RESEARCH  
An agency of the Provincial Health Services Authority

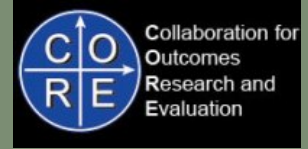

Q2

Please answer the following questions about yourself:

1. What is your age?

Q3

2. What is your sex?

Q3\_1 Female  Q3\_2 Male

Q4

3. What is your highest level of education?

Q4\_1 Some high school  Q4\_2 High school  Q4\_3 College  Q4\_4 Bachelor degree  Q4\_5 Master degree  Q4\_6 Doctorate

Q6

4. How many dependent children do you have?

Q6\_1 0  Q6\_2 1  Q6\_3 2  Q6\_4 3 or more

Q8

5. How do you describe your current health?

Q8\_1 Excellent  Q8\_2 Very good  Q8\_3 Good  Q8\_4 With some health problems  Q8\_5 Having serious health problems

Q9

6. Do you know any one among your family or friends who has been diagnosed with cancer?

Q9\_1 Yes, very closely  Q9\_2 Yes  Q9\_3 No

Q13

7. What is your household's income range?

Q13\_1 Less than 25000 a year  Q13\_2 Between 25000 to 50000 a year  Q13\_3 Between 50000 to 75000 a year  Q13\_4 Between 75000 to 100000  Q13\_5 Between 100000 to 125000 a year  Q13\_6 125000 or more

Next

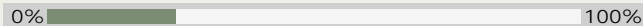

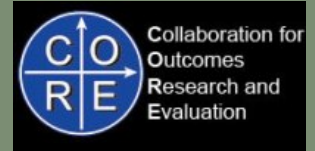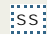

### Questionnaire

Imagine that you have been diagnosed with a fast-acting but curable cancer and you should decide whether to receive the new treatment in addition to regular chemotherapy. The genetic test can potentially **predict whether you are a responder or a non-responder** to the new medication.

Please answer the following questions about your preferences for the new medication and its associated genetic test. In each question you can choose between **option A** or **option B** based on their attributes. Also you may prefer not to be tested by choosing the **neither option**. If you don't take a genetic test, you will be given the new medication in addition to standard chemotherapy without knowing if you are a responder or a non-responder.

Next

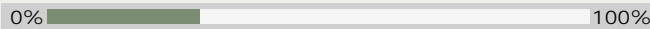





CBCRAN1

If these were your only options, which would you choose?  
Move the mouse over each attribute for its definition.

| Attributes                                     | Option A           | Option B     | Neither        |
|------------------------------------------------|--------------------|--------------|----------------|
| <u>Untreated Responders</u>                    | 50 out of 100      | 5 out of 100 | 0 out of 100   |
| <u>Unnecessary Treatment of Non-responders</u> | 50 out of 100      | 5 out of 100 | 100 out of 100 |
| <u>Severity of Side Effects</u>                | Moderate           | Mild         | Severe         |
| <u>Likelihood of Side Effects</u>              | 50 out of 100      | 5 out of 100 | 95 out of 100  |
| <u>Cost</u>                                    | \$1000             | \$500        | \$0            |
| <u>Test Turnaround Time</u>                    | 7 days             | 2 days       | 0 days         |
| <u>Genetic Test Procedure</u>                  | Bone Marrow Biopsy | Blood Sample | None           |

Next

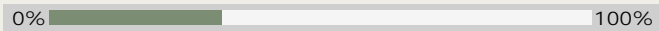



CBCRAN2

If these were your only options, which would you choose?  
Move the mouse over each attribute for its definition.

| Attributes                                     | Option A      | Option B      | Neither        |
|------------------------------------------------|---------------|---------------|----------------|
| <u>Untreated Responders</u>                    | 35 out of 100 | 20 out of 100 | 0 out of 100   |
| <u>Unnecessary Treatment of Non-responders</u> | 20 out of 100 | 35 out of 100 | 100 out of 100 |
| <u>Severity of Side Effects</u>                | Severe        | Mild          | Severe         |
| <u>Likelihood of Side Effects</u>              | 95 out of 100 | 50 out of 100 | 95 out of 100  |
| <u>Cost</u>                                    | \$50          | \$1500        | \$0            |
| <u>Test Turnaround Time</u>                    | 12 days       | 2 days        | 0 days         |
| <u>Genetic Test Procedure</u>                  | Tumor Biopsy  | Mouth Swab    | None           |

Next

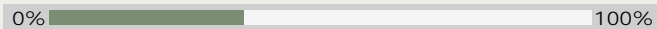

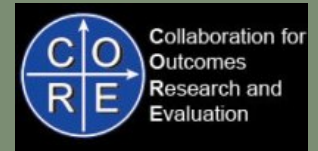

CBCRAN3

If these were your only options, which would you choose?  
Move the mouse over each attribute for its definition.

| Attributes                                     | Option A      | Option B      | Neither        |
|------------------------------------------------|---------------|---------------|----------------|
| <u>Untreated Responders</u>                    | 5 out of 100  | 20 out of 100 | 0 out of 100   |
| <u>Unnecessary Treatment of Non-responders</u> | 35 out of 100 | 5 out of 100  | 100 out of 100 |
| <u>Severity of Side Effects</u>                | Moderate      | Severe        | Severe         |
| <u>Likelihood of Side Effects</u>              | 95 out of 100 | 5 out of 100  | 95 out of 100  |
| <u>Cost</u>                                    | \$500         | \$1000        | \$0            |
| <u>Test Turnaround Time</u>                    | 7 days        | 12 days       | 0 days         |
| <u>Genetic Test Procedure</u>                  | Tumor Biopsy  | Liver Biopsy  | None           |

Next

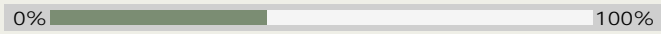



CBCRAN4

If these were your only options, which would you choose?  
Move the mouse over each attribute for its definition.

| Attributes                                     | Option A      | Option B      | Neither        |
|------------------------------------------------|---------------|---------------|----------------|
| <u>Untreated Responders</u>                    | 35 out of 100 | 50 out of 100 | 0 out of 100   |
| <u>Unnecessary Treatment of Non-responders</u> | 50 out of 100 | 20 out of 100 | 100 out of 100 |
| <u>Severity of Side Effects</u>                | Mild          | Moderate      | Severe         |
| <u>Likelihood of Side Effects</u>              | 5 out of 100  | 95 out of 100 | 95 out of 100  |
| <u>Cost</u>                                    | \$50          | \$1500        | \$0            |
| <u>Test Turnaround Time</u>                    | 7 days        | 2 days        | 0 days         |
| <u>Genetic Test Procedure</u>                  | Mouth Swab    | Liver Biopsy  | None           |

Next

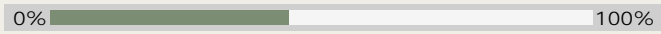



CBCFIX1

If these were your only options, which would you choose?  
Move the mouse over each attribute for its definition.

| Attributes                                     | Option A     | Option B           | Neither        |
|------------------------------------------------|--------------|--------------------|----------------|
| <u>Untreated Responders</u>                    | 5 out of 100 | 20 out of 100      | 0 out of 100   |
| <u>Unnecessary Treatment of Non-responders</u> | 5 out of 100 | 35 out of 100      | 100 out of 100 |
| <u>Severity of Side Effects</u>                | Mild         | Moderate           | Severe         |
| <u>Likelihood of Side Effects</u>              | 5 out of 100 | 50 out of 100      | 95 out of 100  |
| <u>Cost</u>                                    | \$50         | \$500              | \$0            |
| <u>Test Turnaround Time</u>                    | 2 days       | 7 days             | 0 days         |
| <u>Genetic Test Procedure</u>                  | Mouth Swab   | Bone Marrow Biopsy | None           |

Next

0%  100%



CBCRAN5

If these were your only options, which would you choose?  
Move the mouse over each attribute for its definition.

Attributes

Option A

Option B

Neither

Untreated Responders

5 out of 100

20 out of 100

0 out of 100

Unnecessary Treatment of Non-responders

50 out of 100

5 out of 100

100 out of 100

Severity of Side Effects

Severe

Mild

Severe

Likelihood of Side Effects

50 out of 100

95 out of 100

95 out of 100

Cost

\$1500

\$50

\$0

Test Turnaround Time

12 days

7 days

0 days

Genetic Test Procedure

Blood Sample

Bone Marrow Biopsy

None

Next

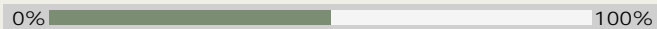



CBCRAN6

If these were your only options, which would you choose?  
Move the mouse over each attribute for its definition.

| Attributes                                     | Option A      | Option B           | Neither        |
|------------------------------------------------|---------------|--------------------|----------------|
| <u>Untreated Responders</u>                    | 50 out of 100 | 35 out of 100      | 0 out of 100   |
| <u>Unnecessary Treatment of Non-responders</u> | 35 out of 100 | 20 out of 100      | 100 out of 100 |
| <u>Severity of Side Effects</u>                | Moderate      | Severe             | Severe         |
| <u>Likelihood of Side Effects</u>              | 5 out of 100  | 50 out of 100      | 95 out of 100  |
| <u>Cost</u>                                    | \$1000        | \$500              | \$0            |
| <u>Test Turnaround Time</u>                    | 12 days       | 2 days             | 0 days         |
| <u>Genetic Test Procedure</u>                  | Mouth Swab    | Bone Marrow Biopsy | None           |

Next

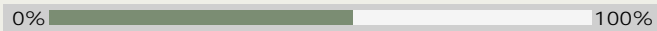



CBCRAN7

If these were your only options, which would you choose?  
Move the mouse over each attribute for its definition.

Attributes

Option A

Option B

Neither

Untreated Responders

20 out of 100

50 out of 100

0 out of 100

Unnecessary Treatment of Non-responders

20 out of 100

5 out of 100

100 out of 100

Severity of Side Effects

Moderate

Mild

Severe

Likelihood of Side Effects

5 out of 100

50 out of 100

95 out of 100

Cost

\$1500

\$500

\$0

Test Turnaround Time

7 days

12 days

0 days

Genetic Test Procedure

Blood Sample

Tumor Biopsy

None

Next

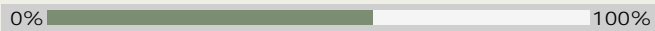





CBCRAN8

If these were your only options, which would you choose?  
Move the mouse over each attribute for its definition.

Attributes

Option A

Option B

Neither

Untreated Responders

5 out of 100

35 out of 100

0 out of 100

Unnecessary Treatment of Non-responders

50 out of 100

35 out of 100

100 out of 100

Severity of Side Effects

Severe

Moderate

Severe

Likelihood of Side Effects

95 out of 100

50 out of 100

95 out of 100

Cost

\$1000

\$50

\$0

Test Turnaround Time

2 days

12 days

0 days

Genetic Test Procedure

Liver Biopsy

Blood Sample

None

Next

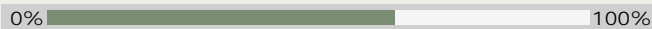



CBCFIX2

If these were your only options, which would you choose?  
Move the mouse over each attribute for its definition.

| Attributes                                     | Option A           | Option B     | Neither        |
|------------------------------------------------|--------------------|--------------|----------------|
| <u>Untreated Responders</u>                    | 20 out of 100      | 5 out of 100 | 0 out of 100   |
| <u>Unnecessary Treatment of Non-responders</u> | 35 out of 100      | 5 out of 100 | 100 out of 100 |
| <u>Severity of Side Effects</u>                | Moderate           | Mild         | Severe         |
| <u>Likelihood of Side Effects</u>              | 50 out of 100      | 5 out of 100 | 95 out of 100  |
| <u>Cost</u>                                    | \$500              | \$50         | \$0            |
| <u>Test Turnaround Time</u>                    | 7 days             | 2 days       | 0 days         |
| <u>Genetic Test Procedure</u>                  | Bone Marrow Biopsy | Mouth Swab   | None           |

Next

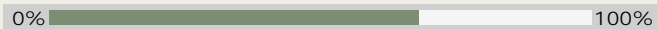



CBCRAN9

If these were your only options, which would you choose?  
Move the mouse over each attribute for its definition.

| Attributes                                     | Option A      | Option B      | Neither        |
|------------------------------------------------|---------------|---------------|----------------|
| <u>Untreated Responders</u>                    | 5 out of 100  | 50 out of 100 | 0 out of 100   |
| <u>Unnecessary Treatment of Non-responders</u> | 20 out of 100 | 35 out of 100 | 100 out of 100 |
| <u>Severity of Side Effects</u>                | Mild          | Severe        | Severe         |
| <u>Likelihood of Side Effects</u>              | 95 out of 100 | 5 out of 100  | 95 out of 100  |
| <u>Cost</u>                                    | \$1000        | \$50          | \$0            |
| <u>Test Turnaround Time</u>                    | 7 days        | 2 days        | 0 days         |
| <u>Genetic Test Procedure</u>                  | Mouth Swab    | Tumor Biopsy  | None           |

Next

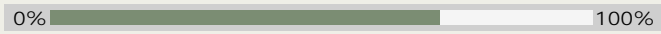



CBCRAN10

If these were your only options, which would you choose?  
Move the mouse over each attribute for its definition.

| Attributes                                     | Option A           | Option B      | Neither        |
|------------------------------------------------|--------------------|---------------|----------------|
| <u>Untreated Responders</u>                    | 20 out of 100      | 35 out of 100 | 0 out of 100   |
| <u>Unnecessary Treatment of Non-responders</u> | 50 out of 100      | 5 out of 100  | 100 out of 100 |
| <u>Severity of Side Effects</u>                | Moderate           | Severe        | Severe         |
| <u>Likelihood of Side Effects</u>              | 95 out of 100      | 50 out of 100 | 95 out of 100  |
| <u>Cost</u>                                    | \$500              | \$1500        | \$0            |
| <u>Test Turnaround Time</u>                    | 12 days            | 7 days        | 0 days         |
| <u>Genetic Test Procedure</u>                  | Bone Marrow Biopsy | Liver Biopsy  | None           |

Next

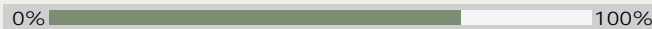

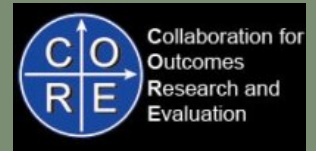

CBCRAN11

If these were your only options, which would you choose?  
Move the mouse over each attribute for its definition.

| Attributes                                     | Option A      | Option B      | Neither        |
|------------------------------------------------|---------------|---------------|----------------|
| <u>Untreated Responders</u>                    | 50 out of 100 | 35 out of 100 | 0 out of 100   |
| <u>Unnecessary Treatment of Non-responders</u> | 35 out of 100 | 50 out of 100 | 100 out of 100 |
| <u>Severity of Side Effects</u>                | Severe        | Mild          | Severe         |
| <u>Likelihood of Side Effects</u>              | 95 out of 100 | 5 out of 100  | 95 out of 100  |
| <u>Cost</u>                                    | \$500         | \$1000        | \$0            |
| <u>Test Turnaround Time</u>                    | 7 days        | 2 days        | 0 days         |
| <u>Genetic Test Procedure</u>                  | Blood Sample  | Tumor Biopsy  | None           |

Next

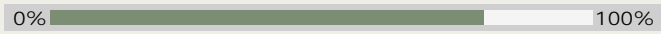



CBCRAN12

If these were your only options, which would you choose?  
Move the mouse over each attribute for its definition.

| Attributes                                     | Option A      | Option B           | Neither        |
|------------------------------------------------|---------------|--------------------|----------------|
| <u>Untreated Responders</u>                    | 5 out of 100  | 20 out of 100      | 0 out of 100   |
| <u>Unnecessary Treatment of Non-responders</u> | 5 out of 100  | 20 out of 100      | 100 out of 100 |
| <u>Severity of Side Effects</u>                | Moderate      | Mild               | Severe         |
| <u>Likelihood of Side Effects</u>              | 50 out of 100 | 5 out of 100       | 95 out of 100  |
| <u>Cost</u>                                    | \$50          | \$1500             | \$0            |
| <u>Test Turnaround Time</u>                    | 2 days        | 12 days            | 0 days         |
| <u>Genetic Test Procedure</u>                  | Mouth Swab    | Bone Marrow Biopsy | None           |

Next

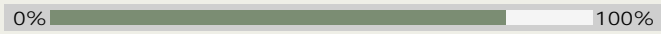



CBCRAN13

If these were your only options, which would you choose?  
Move the mouse over each attribute for its definition.

Attributes

Option A

Option B

Neither

Untreated Responders

35 out of 100

50 out of 100

0 out of 100

Unnecessary Treatment of Non-responders

5 out of 100

20 out of 100

100 out of 100

Severity of Side Effects

Moderate

Mild

Severe

Likelihood of Side Effects

95 out of 100

50 out of 100

95 out of 100

Cost

\$1000

\$50

\$0

Test Turnaround Time

2 days

7 days

0 days

Genetic Test Procedure

Blood Sample

Liver Biopsy

None

Next

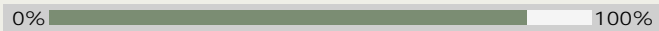



CBCRAN14

If these were your only options, which would you choose?  
Move the mouse over each attribute for its definition.

| Attributes                                     | Option A      | Option B           | Neither        |
|------------------------------------------------|---------------|--------------------|----------------|
| <u>Untreated Responders</u>                    | 20 out of 100 | 5 out of 100       | 0 out of 100   |
| <u>Unnecessary Treatment of Non-responders</u> | 50 out of 100 | 35 out of 100      | 100 out of 100 |
| <u>Severity of Side Effects</u>                | Moderate      | Severe             | Severe         |
| <u>Likelihood of Side Effects</u>              | 50 out of 100 | 5 out of 100       | 95 out of 100  |
| <u>Cost</u>                                    | \$500         | \$1500             | \$0            |
| <u>Test Turnaround Time</u>                    | 7 days        | 12 days            | 0 days         |
| <u>Genetic Test Procedure</u>                  | Tumor Biopsy  | Bone Marrow Biopsy | None           |

Next

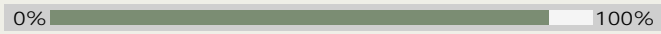



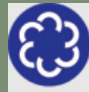

**BC Cancer Agency**  
CARE & RESEARCH  
An agency of the Provincial Health Services Authority

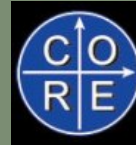

Collaboration for  
Outcomes  
Research and  
Evaluation

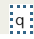

Thank you for completing this survey. Before you exit this survey please share with us your thoughts and comments about any aspect of this study such as clarity of questions, relevance, descriptions and definitions or any other issue. Your comments and feedback are greatly appreciated and will help us to improve the next phases of this study.

Next

0%  100%

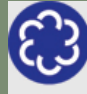

**BC Cancer Agency**  
CARE & RESEARCH  
An agency of the Provincial Health Services Authority

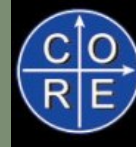

Collaboration for  
Outcomes  
Research and  
Evaluation

fin

Note:

This page has a link on it. When the survey is run this page will be redirected to:

[http://surveys.ipsosinteractive.com/wix/p375673781.aspx?l=\[SCRIPT\]&r=\[SCRIPT\]&s=\[SCRIPT\]&BVAR=1&hid\\_test\\_mode=1](http://surveys.ipsosinteractive.com/wix/p375673781.aspx?l=[SCRIPT]&r=[SCRIPT]&s=[SCRIPT]&BVAR=1&hid_test_mode=1)

Powered by Sawtooth Software, Inc.

0% 100%
